# Supplementary material for: Prognostic Value of Pulmonary Artery Pulsatility Index in Right Ventricle Failure-Related Mortality in Inoperable Chronic Thromboembolic Pulmonary Hypertension
Source: MDPI journal article supplement (doi:10.3390/jcm11102735), 2022-05-12
Supplement: s1 [file s1]

Supplementary Table S1. Characteristics of inoperable CTEPH patients excluded from the study.

| Patient ID | Sex | Age at diagnosis (years) | Cause of exclusion         | Cause of death                          |
|------------|-----|--------------------------|----------------------------|-----------------------------------------|
| 1          | F   | 70                       | Lack of consent            |                                         |
| 2          | M   | 83                       | Non-CTEPH related death    | Colon cancer                            |
| 3          | F   | 67                       | Non-CTEPH related death    | Abdominal surgery-related complications |
| 4          | F   | 89                       | Non-CTEPH related death    | Sepsis                                  |
| 5          | F   | 27                       | CTEPH persistent after PEA | -                                       |
| 6          | F   | 57                       | CTEPH persistent after PEA |                                         |
| 7          | M   | 73                       | Non-CTEPH related death    | Orthopedic surgery related complication |
| 8          | F   | 36                       | Lack of follow-up          |                                         |
| 9          | M   | 66                       | Lack of consent            |                                         |
| 10         | F   | 78                       | Lack of follow-up          |                                         |
| 11         | M   | 59                       | CTEPH persistent after PEA |                                         |
| 12         | M   | 67                       | CTEPH persistent after PEA |                                         |
| 13         | F   | 70                       | Lack of consent            |                                         |
| 14         | M   | 53                       | Lack of consent            |                                         |
| 15         | M   | 55                       | CTEPH persistent after PEA |                                         |
| 16         | M   | 89                       | Non-CTEPH related death    | COVID-19                                |
| 17         | M   | 70                       | Non-CTEPH related death    | Sepsis                                  |
| 18         | F   | 74                       | Non-CTEPH related death    | Sepsis                                  |
| 19         | M   | 59                       | Non-CTEPH related death    | Colon cancer                            |
| 20         | F   | 61                       | Unknown cause of death     |                                         |

Abbreviations: CTEPH – chronic thromboembolic pulmonary hypertension; F – female; M – male; PEA – pulmonary endarterectomy
